# Supplementary material
Source: Springer Nature journal article supplement (https://www.springermedizin.de/resource/supplementary/13019_2013_1558_MOESM1_ESM.pdf/9640596)

**A**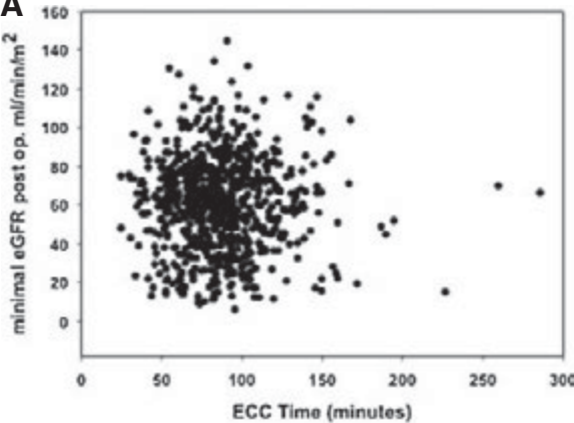**B**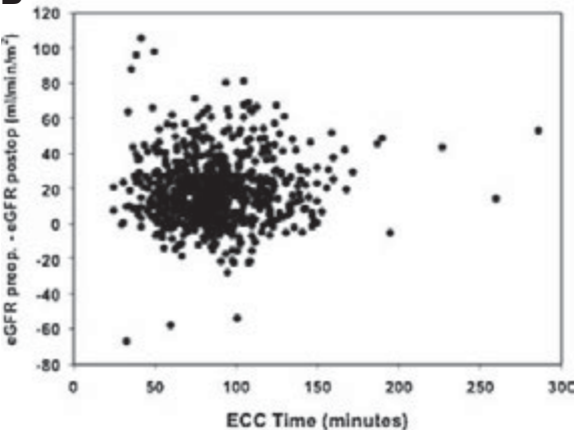

Supplement: MOESM1 [file 9640596]
